Anesthesiology  
46:308, 1977

## Nitrous Oxide and Hypoxic Ventilatory Responses

*To the Editor:*—The article by Yacoub and colleagues (ANESTHESIOLOGY 45: 385–389, 1976) is both interesting and important because nitrous oxide has long been regarded as a harmless gaseous anesthetic, causing minimal physiologic derangement. When describing the ventilatory response to hypoxia, Yacoub plotted ventilation ( $\dot{V}_E$ ) vs. alveolar  $P_{O_2}$  ( $PA_{O_2}$ ). A hyperbolic function was obtained and an "A" value derived as described by Weil *et al.*<sup>1</sup> It is now recognized that the ventilatory response to hypoxia varies linearly with arterial oxygen saturation ( $Sa_{O_2}$ ).<sup>2–4</sup> Thus, by plotting  $\dot{V}_E$  vs.  $Sa_{O_2}$ , a linear function may be obtained. The straight lines thus generated are suitable for analysis by simple, conventional, statistical methods. Ear oximetry, with its advantages of non-invasiveness and immediate information, may be used to measure  $Sa_{O_2}$  during experiments.<sup>5</sup>

We have taken the data presented in figure 1 of Yacoub's article and converted  $PA_{O_2}$  to  $Sa_{O_2}$ . We then replotted Yacoub's data in the format suggested by Rebuck and Campbell<sup>3</sup> and Rebuck and Woodley<sup>4</sup> and obtained a linear function of the ventilatory response to hypoxia. Severinghaus has recently used a similar method to reexamine his previous data and has confirmed Rebuck's observations.<sup>6</sup> Using this method, the ventilatory response to hypoxia (without added resistance) in figure 1 of Yacoub's article becomes 0.41 l/min/l per cent decrease in  $Sa_{O_2}$ . The correlation coefficient of the line is 0.9. With nitrous oxide, the slope decreases to 0.11 l/min/l per cent decrease in  $Sa_{O_2}$ . The decrease in the ventilatory response produced by nitrous oxide inhalation is highly significant ( $P < .001$ ).

Anesthesiology  
46:308–309, 1977

## Removal of an Inflated Endotracheal Tube Cuff

*To the Editor:*—As developers of the Bivona Cuff, we were perturbed by the report by Doctors Tavakoli and Corssen<sup>1</sup> of an isolated case in which a "hazardous complication" occurred because of separation of the pilot tube from the body of the endotracheal tube, thereby making routine deflation of the cuff impossible.

Directions for the use of a Bivona Fome-Cuf tube, accompanying each package, clearly state that the unit may be removed without cuff deflation. In no way is extubation hampered by an accidental loss of the pilot tube. The foam-filled cuff can be

When the ventilatory response to hypoxia is expressed in terms of  $Sa_{O_2}$  rather than alveolar oxygen pressure, there are further advantages other than linearization of the response curves. It no longer becomes necessary to assume a level of arterial oxygenation from alveolar  $P_{O_2}$  measured at the mouth. When  $Sa_{O_2}$  is displayed continuously by the ear oximeter throughout hypoxic exposures, hypoxic studies in man will be safer and more readily accepted.

DAVID Z. N. FRANKEL, M.D.  
Physiological Monitoring Resident  
Department of Anesthesia  
Toronto General Hospital  
University of Toronto  
Toronto, Ontario, Canada

## REFERENCES

1. Weil JV, Byrne-Quinn E, Sodal IE, et al: Hypoxic ventilatory drive in normal man. *J Clin Invest* 49: 1061–1072, 1970
2. Edelman NH, Epstein PE, Lahiri S, et al: Ventilatory responses to transient hypoxia and hypercapnia in man. *Resp Physiol* 17:302–314, 1973
3. Rebuck AS, Campbell EJM: A clinical method for assessing the ventilatory response to hypoxia. *Am Rev Resp Dis* 109:345–350, 1974
4. Rebuck AS, Woodley WE: Ventilatory effects of hypoxia and their dependence on  $P_{CO_2}$ . *J Appl Physiol* 38:16–19, 1975
5. Saunders NA, Powles SCP, Rebuck AS: Ear oximetry: Accuracy and practicability in the assessment of arterial oxygenation. *Am Rev Resp Dis* 113:745–749, 1976
6. Severinghaus JW: Proposed standard determination of ventilatory responses to hypoxia and hypercapnia in man. *Chest (suppl)* 70:129–131, 1976

(Accepted for publication November 29, 1976.)

contracted either by applying suction to the pilot tube or by squeezing the cuff. The former, of course, is the common clinically accepted practice. But, in the event the pilot port is accidentally sheared off, the cuff will still collapse as it is gently pulled out (squeezed) through the vocal cords. This can be easily demonstrated by pulling a lightly lubricated cuff through one's partially opened fingers.

Several of our colleagues have commented that they prefer not to deflate the cuff prior to extubation because they believe that accumulated secre-
